# Supplementary material for: The Female Sexual Function Index (FSFI): Translation, Validation, and Cross‐Cultural Adaptation of an Urdu Version “FSFI–U”
Source: PubMed Central journal article supplement — Sex Med. 2015 Nov 23;3(4):244–50. doi: 10.1002/sm2.77 (PMC4721033; doi:10.1002/sm2.77), 2015-11-23
Supplement: SM2-3-244-s001.pdf [file SM2-3-244-s001.pdf]

# عورتوں میں جنسی کارکردگی کا بین الاقوامی پیمانہ

Subject Identifier.....

Date.....

ہدایات: یہ سوالات پچھلے چار ہفتوں کے دوران آپ کے جنسی محسوسات اور ان سے متعلق آپ کے رد عمل کے بارے میں ہیں۔ ان کے جوابات پوری سچائی اور وضاحت کے ساتھ دینے کی کوشش کیجئے۔ آپ اطمینان رکھیے کہ آپ کے جوابات کے سلسلے میں پوری رازداری برتی جائے گی۔ آپ کی سہولت کیلئے اس سوالنامے میں استعمال ہونے والی بعض اصطلاحات کی تشریح درج ذیل ہے۔

جنسی سرگرمی سے مراد بوس و کنار، ہم بستری سے پہلے کی چھیڑ چھاڑ، ساتھی کے بغیر خود لذتی اور ہم بستری تمام چیزیں ہیں ہم بستری سے مراد مردانہ عضو متاسل کا زنا نہ جنسی اعضا میں داخل ہونا ہے

جنسی تحریک سے مراد ساتھی کے ساتھ ہم بستری سے پہلے کی چھیڑ چھاڑ، بوس و کنار، ساتھی کے بغیر خود لذتی، اور جنسی خیالات سبھی شامل ہیں

جنسی خواہش یا دلچسپی سے مراد وہ تمام احساسات ہیں جو جنسی سرگرمی شروع کرنے کی خواہش کے ساتھ پیدا ہوتے ہیں۔ اس میں ساتھی کی طرف سے جنسی پیش قدمی ہونے پر آپ کی طرف سے آمادگی کے جذبات، اور جنسی خیالات سبھی شامل ہیں

سوالنامہ پُر کرتے وقت ہر سوال کے نیچے دیئے گئے خانوں میں سے صرف ایک پر نشان لگانیے

5) پچھلے چار ہفتوں میں آپ کو اپنے آپ پر کتنا بھروسہ ہا کہ جب جنسی ملاپ (ہم بستری) کا وقت آئے گا تو آپ میں جنسی جوش پیدا ہو جائے گا؟

- کوئی جنسی سرگرمی نہیں  
 مکمل بھروسہ  
 کافی  
 درمیانہ  
 کم  
 بہت ہی کم (نہ ہونے کے برابر)

6) پچھلے چار ہفتوں میں جنسی ملاپ (ہم بستری) کے دوران کتنی مرتبہ آپ اپنے جنسی جوش سے مطمئن ہوئیں؟

- کوئی جنسی سرگرمی نہیں  
 ہمیشہ یا تقریباً ہمیشہ  
 اکثر (آدھے سے زیادہ موقعوں پر)  
 کبھی کبھار (تقریباً آدھے موقعوں پر)  
 شاز و نادر (آدھے سے کم موقعوں پر)  
 کبھی نہیں (یا تقریباً کبھی نہیں)

7) پچھلے چار ہفتوں میں جنسی ملاپ (ہم بستری) کے دوران آپ کتنی مرتبہ گیلی ہوئیں؟

- کوئی جنسی سرگرمی نہیں  
 ہمیشہ یا تقریباً ہمیشہ  
 اکثر (آدھے سے زیادہ موقعوں پر)  
 کبھی کبھار (تقریباً آدھے موقعوں پر)  
 شاز و نادر (آدھے سے کم موقعوں پر)  
 کبھی نہیں (یا تقریباً کبھی نہیں)

8) پچھلے چار ہفتوں میں جنسی ملاپ (ہم بستری) کے دوران گیلیا ہونے میں آپ کو کتنی مشکل پیش آئی؟

- کوئی جنسی سرگرمی نہیں  
 انتہائی مشکل (تقریباً ناممکن)  
 کافی مشکل  
 مشکل  
 تھوڑی سی مشکل  
 کوئی مشکل نہیں

1) پچھلے چار ہفتوں میں آپ کے اندر جنسی ملاپ (ہم بستری) کی خواہش کتنی دفعہ پیدا ہوئی؟

- ہمیشہ یا تقریباً ہمیشہ  
 اکثر (آدھے سے زیادہ موقعوں پر)  
 کبھی کبھار (تقریباً آدھے موقعوں پر)  
 شاز و نادر (آدھے سے کم موقعوں پر)  
 کبھی نہیں (یا تقریباً کبھی نہیں)

2) پچھلے چار ہفتوں میں آپ کے اندر جنسی ملاپ (ہم بستری) کی خواہش کتنی شدت سے پیدا ہوئی؟

- (جنسی ملاپ کی خواہش ذہنی اور جسمانی دونوں سطحوں پر پیدا ہو سکتی ہے۔ اس میں ذہنی خواہش کے علاوہ جنسی اعضا میں جھنجھناہٹ، لیکوریا (گیلا ہونا) اور پٹوں کا تھوڑا سا جوش بھی شامل ہے)
- بہت زیادہ شدید  
 کافی شدید  
 درمیانہ  
 کم  
 بہت ہی کم (نہ ہونے کے برابر)

3) پچھلے چار ہفتوں میں جنسی ملاپ (ہم بستری) کے دوران کتنی مرتبہ آپ میں جنسی جوش پیدا ہوا؟

- ہمیشہ یا تقریباً ہمیشہ  
 اکثر (آدھے سے زیادہ موقعوں پر)  
 کبھی کبھار (تقریباً آدھے موقعوں پر)  
 شاز و نادر (آدھے سے کم موقعوں پر)  
 کبھی نہیں (یا تقریباً کبھی نہیں)

4) پچھلے چار ہفتوں میں جنسی ملاپ (ہم بستری) کے دوران آپ کے جنسی جوش میں کتنی شدت رہی؟

- بہت زیادہ شدید  
 کافی شدید  
 درمیانہ  
 کم  
 بہت ہی کم (نہ ہونے کے برابر)

9) بچھلے چارہفتوں میں آپ کی رطوبت (گیلا ہونا) کتنی دفعہ جنسی ملاپ (ہم بستری) کے آخر دم تک قائم رہی؟

- کوئی جنسی سرگرمی نہیں  
 ہمیشہ یا تقریباً ہمیشہ  
 اکثر (آدھے سے زیادہ موقعوں پر)  
 کبھی کبھار (تقریباً آدھے موقعوں پر)  
 شاز و نادر (آدھے سے کم موقعوں پر)  
 کبھی نہیں (یا تقریباً کبھی نہیں)

10) بچھلے چارہفتوں میں آپ کو اپنی رطوبت (گیلا ہونا) کو جنسی ملاپ (ہم بستری) کے آخر دم تک قائم رکھنے میں کتنی مشکل پیش آئی؟

- کوئی جنسی سرگرمی نہیں  
 انتہائی مشکل (تقریباً ناممکن)  
 کافی مشکل  
 مشکل  
 تھوڑی سی مشکل  
 کوئی مشکل نہیں

11) بچھلے چارہفتوں میں جنسی سرگرمی یا ہم بستری کے ذریعے لٹی دفعہ آپ جنسی تسکین کی انتہا تک پہنچیں (فارغ یا خلاص ہوئیں)؟

- کوئی جنسی سرگرمی نہیں  
 ہمیشہ یا تقریباً ہمیشہ  
 اکثر (آدھے سے زیادہ موقعوں پر)  
 کبھی کبھار (تقریباً آدھے موقعوں پر)  
 شاز و نادر (آدھے سے کم موقعوں پر)  
 کبھی نہیں (یا تقریباً کبھی نہیں)

12) بچھلے چارہفتوں میں جنسی سرگرمی یا ہم بستری کے ذریعے جنسی تسکین کی انتہا تک پہنچنے (خلاص یا فارغ ہونے) میں آپ کو کتنی مشکل پیش آئی؟

- کوئی جنسی سرگرمی نہیں  
 انتہائی مشکل (تقریباً ناممکن)  
 کافی مشکل  
 مشکل  
 تھوڑی سی مشکل  
 کوئی مشکل نہیں

13) بچھلے چارہفتوں میں آپ کو کتنا بھروسہ تھا کہ آپ جنسی سرگرمی یا ہم بستری کے ذریعے جنسی تسکین کی انتہا تک پہنچ سکتے ہیں (خلاص یا فارغ ہو سکتے ہیں)؟

- کوئی جنسی سرگرمی نہیں  
 مکمل بھروسہ  
 کافی  
 درمیانہ  
 کم  
 بہت ہی کم (نہ ہونے کے برابر)

14) بچھلے چارہفتوں میں جنسی ملاپ (ہم بستری) کے دوران آپ اپنے ساتھی کے ساتھ اپنی جذباتی قربت سے کتنی مطمئن تھیں؟

- کوئی جنسی سرگرمی نہیں  
 انتہائی مطمئن  
 کافی مطمئن  
 کبھی مطمئن/کبھی غیر مطمئن  
 کم مطمئن  
 غیر مطمئن

15) بچھلے چارہفتوں میں جنسی ملاپ (ہم بستری) کے دوران آپ اپنے ساتھی کے ساتھ اپنے جنسی رشتے سے کس حد تک مطمئن رہیں؟

- انتہائی مطمئن  
 کافی مطمئن  
 کبھی مطمئن/کبھی غیر مطمئن  
 کم مطمئن  
 غیر مطمئن

16) بچھلے چارہفتوں میں آپ اپنی جنسی زندگی سے کس حد تک مطمئن رہیں؟

- انتہائی مطمئن  
 کافی مطمئن  
 کبھی مطمئن/کبھی غیر مطمئن  
 کم مطمئن  
 غیر مطمئن

17) بچھلے چارہفتوں میں جنسی ملاپ (ہم بستری) کے دوران جب ساتھی آپ کے اندر داخل ہوا تو کتنی دفعہ آپ کو تکلیف یا درد محسوس ہوا؟

- ہم بستری کی کوشش ہی نہیں کی  
 ہمیشہ یا تقریباً ہمیشہ  
 اکثر (آدھے سے زیادہ موقعوں پر)  
 کبھی کبھار (تقریباً آدھے موقعوں پر)  
 شاز و نادر (آدھے سے کم موقعوں پر)  
 کبھی نہیں (یا تقریباً کبھی نہیں)

18) بچھلے چارہفتوں میں جنسی ملاپ (ہم بستری) کے دوران جب ساتھی آپ کے اندر داخل ہوا تو اسکے بعد کتنی دفعہ آپ کو تکلیف یا درد محسوس ہوا؟

- ہم بستری کی کوشش ہی نہیں کی  
 ہمیشہ یا تقریباً ہمیشہ  
 اکثر (آدھے سے زیادہ موقعوں پر)  
 کبھی کبھار (تقریباً آدھے موقعوں پر)  
 شاز و نادر (آدھے سے کم موقعوں پر)  
 کبھی نہیں (یا تقریباً کبھی نہیں)

19) بچھلے چارہفتوں میں آپ جنسی ملاپ (ہم بستری) کے دوران یا بعد میں ہونے والی تکلیف یا درد کی شدت کو کس درجے پر رکھیں گی؟

- ہم بستری کی کوشش ہی نہیں کی  
 بہت زیادہ شدید  
 کافی شدید  
 درمیانہ  
 کم  
 بہت ہی کم (نہ ہونے کے برابر)
